# Supplementary material for: Differential expression of the aryl hydrocarbon receptor pathway associates with craniofacial polymorphism in sympatric Arctic charr
Source: EvoDevo. 2015 Sep 16;6:27. doi: 10.1186/s13227-015-0022-6 (PMC4574265; doi:10.1186/s13227-015-0022-6)
Supplement: Supplementary file 2 — Additional file 2: Table S2. Primers designed for cDNA cloning and qPCR study of Arctic charr. [file 13227_2015_22_MOESM2_ESM.xlsx]

## Sheet: Sheet1
Gene	Primer Sequence (5’- 3’)	Type	Product Size (bp)	PCR Efficiency	Exon Boundary	Accession no.
Actb	F-GAAGATCAAGATCATCGCCC/R-CAGACTCGTCGTACTCCTGCT	qPCR	122	0.963474	Yes	JR540730
If5a1	F-GGCTTCGTGGTGCTGAAG/R-CCATGTGGACCTTAGCGTG	qPCR	91	0.933573	Yes	JR540735
Ahr2	F-TCCTCCACAGGGCTCTTGCT/R-GCTGGCGTTGTCCTGGATGAC	qPCR	85	0.918386	No	*
	F-TGGTGGATGGCTGGGCAT/R-GCTGGCGTTGTCCTGGATGAC	Cloning	575		.
Ap2	F-GCGATGGATCGTCACGACG/R-GGGTATGGGAGAGTGGAGGGG	qPCR	103	0.925999	Yes	*
Apaf1	F-CACTTCTCCCCAGACAACACT/R-CTCTCCTTTCTCCACGTTCCAC	qPCR	75	0.933573	Yes	*
	F-CTCTTCCAACGACGGAACCC/R-TCAGAACAGGAGAGCAGTAGAGATC	Cloning	417		.
Brg1	F-AGGATTGCCTGCTTAAATATGTAAGT/R-GACAAGCCAGTGGAGAGG	qPCR	146	0.925999	Yes	*
Carm1	F-CTCTACTTTTGACTAGAGCCACAT/R-CTCCTACACACTGACATCTAGG	qPCR	96	0.9855	Yes	*
Cbp	F-CAGACCCCACATTCCAGC/R-CCATGTGTCCCTGGTCCA	qPCR	133	0.9855	Yes	*
CFl1	F-GACCTGGTCTTCATCATGTGGG/R-CACCTGCCACTCAAACTTCAGAC	qPCR	120	0.9855	Yes	*
	F-GAATAGCGGTCCACGATGAT/R-TTAGACCTCTTTCCCCTCCAG	Cloning	485		.
Chd4	F-CAGGCTACTGTTGTGACAGC/R-GCAGTGAGACTCCAGATGTC	qPCR	103	0.925999	Yes	*
	F-CCACAGTGTCCAGGAGTCAGCCT/R-GAGTCCCACCAACACCTCAGCAAG	Cloning	397		.
Chd7	F-CTGGACCGACATTGTCAAGCAATC/R-TGGCGATCTCCGATTTGGG	qPCR	128	0.978196	Yes	*
Cldn4	F-GTGCTGTGCCATCCCAAG/R-CACCACACAGGTCATCCACA	qPCR	100	0.9855	Yes	*
Cox2	F-CCTACACCTACCCCCAGT/R-TCCACCAGCCACCCTTC	qPCR	110	0.925999	Yes	AF158373.1
Cpsf1	F-GCACCAGCGTGAAGGACC/R-GCTCGTCTCTGTCTATGGTCTCAA	qPCR	84	0.910733	Yes	*
Cspp1	F-GCAGTTCAGATACAGAGATGTTGACTC/R-GTCGCTAGGGTGCTCACAGTAAC	qPCR	70	0.948601	Yes	*
	F-CTCTGCCCTGAGGAAGCAGTATGA/R-GTCGCTAGGGTGCTCACAGTAAC	Cloning	556		.
Cyp1a1	F-GCACAGTCAAGGATACATCGC/R-GGTCAGGGTTGAATGAAGAAGG	qPCR	126	0.941106	Yes	*
Cyp1b1	F-TCTCACCATTCCCCACAGC/R-CACTGGTTGATGAAGATCACGG	qPCR	87	0.948601	Yes	NM_001174149.1
Dcaf7	F-GTCTAAAGCCAACCTTCACCTCAG/R-CATGTCCAAGTTCTGAATCCACACAT	qPCR	65	0.925999	Yes	*
Dlg1	F-ATCCGCAGGAGAAAAGCCCTCT/R-CGCAATACTGAATCCTAGCCCTTTG	qPCR	84	0.970854	Yes	*
	F-AGAGTGAATGACTGCATCCTGAGAGTG/R-CAGGTAGTTGGAAGGGCTGATATGGT	Cloning	602		.
E2f1	F-CCAGTGAGGGCTATCAGGTCTCC/R-TAGTTGGGCTGATGCCTGTCACT	qPCR	114	0.963474	Yes	*
Eftud2	F-CTTCTGAGGTGGACAAGGCT/R-CTGATAGGTTCGTCACACAGAGG	qPCR	103	0.963474	Yes	*
Fgfrl1	F-AGGATGAGGATGCTGGCATGTA/R-CTTTGGGTCTGGCAGCACGG	qPCR	95	0.963474	Yes	*
Foxq1	F-CCACAACCTGTCGCTGAACG/R-CATCCAGTAGTTGTCCTTGCCC	qPCR	82	0.978196	No	*
	F-CCCACTCCTGTCTCTTGAACG/R-CCCGCCACCTGTCACAC	Cloning	512		.
Hcfc1	F-AACGCTTGTGGTCGTGGTTC/R-CATCTGGGCTCTTGCTGATTTTG	qPCR	106	0.978196	Yes	*
Jun	F-CACACTCAAACCTCACCTCC/R-CAAAGCCCTCCTGCTCATC	qPCR	191	0.925999	No	*
Jup	F-CACAGCAGACATACCAGGATGG/R-CTGGCGATCTCTCCCCTGTT	qPCR	109	0.963474	Yes	*
	F-CTCCAGTCAGCGTCTGATGC/R-CTGGCGATCTCTCCCCTGTT	Cloning	624		.
Kat6a	R-CGCTTCCCTTTTTGTATCCTTTG/F-CCAGCCCCATTCCTCTTTATA	qPCR	86	0.933573	Yes	*
Kdm5c	F-CTGCCCAACATCCTGTCTCTCCA/R-CTCCCCATTCTGGATCTCCTCC	qPCR	84	0.918386	Yes	*
Maz	F-TTCAAGAGGAAGGACCGCATGA/R-CTGGAGAAAGCCTTGGCACAGT	qPCR	98	0.910733	Yes	*
Med12	F-CACACACACTAATATACAACAAGCAC/R-CAGCTCCAACAACAACTCTCAA	qPCR	120	0.963474	Yes	*
Mvp	F-ACCAACTCCCAGGAGGCT/R-CCTCTCCAGACGACCACG	qPCR	75	0.925999	Yes	*
Myc	F-GTAGCAGCAGCAGCAGTGGTAG/R-GTATCTGACGTGCTGGGGTCG	qPCR	139	0.978196	Yes	*
Notch1	F-GGACTCAAGCCACTGAAGAACATTT/R-CCTGCTCCTCAAACCTAAAGCGTC	qPCR	112	0.925999	Yes	*
Nrf1	F-CCCCCCCTCACCATTGACG/R-CCCTGCCCGTCGAATACTTCA	qPCR	76	0.992768	Yes	*
Psip1	F-GAGAAGGACTCTGACAGTAACCCG/R-CTCTCAGCCCCCGACACTTT	qPCR	86	0.992768	Yes	*
Rbp2	F-GTGGAGGTCTGGATGTGGAA/R-CACAGCATGGTGTGGTGC	qPCR	173	0.925999	Yes	*
Rev3l	F-ATCGGTGTGGACGTGCTCAG/R-AGCGTGGTGAAGTACTGGGAGATA	qPCR	125	0.941106	Yes	*
Scin	F-CACCTGATCCCAGACATCCAA/R-CCTCACTCAACAACCTCGC	qPCR	136	0.925999	No	*
Sp1	F-GGAAGAAATTCACTCGCTCAGACGA/R-CGTGAACTTCTTCTCACCTGTGTGTG	qPCR	71	0.933573	Yes	*
Sult6b1	F-CGTGATAATAGTCACCTTTGAGGAG/R-GCCGTGTGAGTCATTGGAG	qPCR	163	0.910733	Yes	*
Whsc1	F-CCTTCCACCTCTCCTGCCT/R-CTTCCCACACACGTCACAGT	qPCR	86	0.963474	Yes	*
Yy1	F-AAACTCAAACGCCACCAAC/R-CTTCCCACAGCCCTCAAA	qPCR	72	0.925999	Yes	*
	*High quality contig sequences have been published by Gudbrandsson J, et al., 2015 (doi: 10.12688/f1000research.6402.1).
