# Supplementary material for: Differential expression of the aryl hydrocarbon receptor pathway associates with craniofacial polymorphism in sympatric Arctic charr
Source: EvoDevo. 2015 Sep 16;6:27. doi: 10.1186/s13227-015-0022-6 (PMC4574265; doi:10.1186/s13227-015-0022-6)
Supplement: Supplementary file 4 — Additional file 4: Table S4. Transcription factor enrichment analysis using WEB-based GEne SeT AnaLysis Toolkit (WebGestalt v2). The list of more than 200 genes co-expressed with Chd4, Cspp1 and Dlg1 in human and mice are used as input. (Cut-off criteria: p < 0.001 adjusted with hypergeometric statistical analysis; Bonferroni multiple test adjustment). [file 13227_2015_22_MOESM4_ESM.xlsx]

## Sheet: TF enrichment
	TF Enrichment Analysis of Genes Coexpressed with Chd4, Cspp1 and Dlg1
	Homo sapiens								Mus musculus
	TF count	TF	TF matrix ID	Target Genes	EntrezGene	Statistics			TF count	TF	TF matrix ID	Target Genes	EntrezGene	Statistics
	1	NRF1	hsa_RCGCANGCGY_V$NRF1_Q6	32	80018 4659 80155 1660 80143 9643 57534 65125 51322 9652 8242 7750 4850 55749 84859 27332 7536 57120 5591 10147 9774 8189 54832 22931 10806 6418 4660 51495 23081 56946 11325 5885	C=891;O=32;E=10.06;R=3.18;rawP=7.04e-09;adjP=3.27e-06			1	NRF1	mmu_RCGCANGCGY_V$NRF1_Q6	30	57874 218343 22668 67500 56086 329251 231713 19090 225164 234373 19357 232341 68188 56397 17931 66641 70144 76816 20591 74838 225131 94221 19330 76804 13211 72567 76007 53621 320528 72047	C=835;O=30;E=6.43;R=4.67;rawP=2.58e-12;adjP=1.16e-09
	1	NRF1	hsa_V$NRF1_Q6	10	80018 4659 57534 8242 27332 23360 7536 25852 22931 23081	C=244;O=10;E=2.75;R=3.63;rawP=0.0005;adjP=0.0116			1	NRF1	mmu_V$NRF1_Q6	9	231713 225164 20591 76804 19330 74125 22668 17931 55935	C=233;O=9;E=1.79;R=5.02;rawP=8.67e-05;adjP=0.0014
	2	YY1	hsa_V$YY1_02	14	7756 55119 55870 55183 9643 6434 1108 26135 27332 54891 4660 64062 9584 5885	C=234;O=14;E=2.64;R=5.30;rawP=4.67e-07;adjP=0.0001			2	YY1	mmu_V$YY1_02	12	170791 51869 329251 19357 107932 20462 192195 74213 56397 227195 66870 66921	C=221;O=12;E=1.70;R=7.06;rawP=1.63e-07;adjP=1.22e-05
	2	YY1	hsa_GCCATNTTG_V$YY1_Q6	15	7756 55119 546 55183 79066 6434 26135 27332 25852 7158 22902 22823 9584 56946 5885	C=416;O=15;E=4.70;R=3.19;rawP=8.24e-05;adjP=0.0039			2	YY1	mmu_V$YY1_Q6	10	329251 51869 19357 20462 74125 192195 17765 56397 66870 66921	C=224;O=10;E=1.72;R=5.80;rawP=1.01e-05;adjP=0.0004
	2	YY1	hsa_V$YY1_Q6	11	55119 55870 55183 9643 6434 26135 25852 4660 22823 56946 5885	C=236;O=11;E=2.66;R=4.13;rawP=8.10e-05;adjP=0.0039			2	YY1	mmu_GCCATNTTG_V$YY1_Q6	11	170791 51869 67493 19357 20462 74125 22589 52822 17765 66870 66921	C=392;O=11;E=3.02;R=3.65;rawP=0.0002;adjP=0.0026
	3	NF1	hsa_V$NFMUE1_Q6	12	7756 55119 55870 55183 6434 8242 7750 26135 55749 7536 9774 4660	C=236;O=12;E=2.66;R=4.50;rawP=1.64e-05;adjP=0.0015			3	NF1	mmu_V$NFMUE1_Q6	11	329251 51869 20462 20591 72567 22668 192195 67500 66870 76007 66921	C=223;O=11;E=1.72;R=6.41;rawP=1.39e-06;adjP=7.78e-05
	4	MYC	hsa_CACGTG_V$MYC_Q2	27	80018 26057 8886 54880 9643 57645 220988 9702 8065 1108 4850 26135 55749 9736 6731 51105 3326 10147 55193 8087 121665 11198 2778 89782 6418 23195 23081	C=1008;O=27;E=11.38;R=2.37;rawP=2.88e-05;adjP=0.0022			4	MYC	mmu_CACGTG_V$MYC_Q2	27	15516 14359 56086 231713 234373 66661 107932 17847 229279 71458 74360 76804 114741 66923 66942 14683 75717 239510 67500 81702 56397 100019 74585 66870 53621 239833 71592	C=948;O=27;E=7.30;R=3.70;rawP=5.54e-09;adjP=4.96e-07
	4	MYC	hsa_V$MYCMAX_03	9	26057 220988 8065 1108 55749 51105 55193 121665 2778	C=246;O=9;E=2.78;R=3.24;rawP=0.0020;adjP=0.0287			4	MYC	mmu_V$MYCMAX_03	9	107932 229279 66923 14683 75717 239510 67500 81702 74585	C=230;O=9;E=1.77;R=5.09;rawP=7.85e-05;adjP=0.0014
	5	MAZ	hsa_GGGAGGRR_V$MAZ_Q6	44	79893 8502 4659 26057 25831 9887 54880 57645 220988 25836 79066 9702 65125 51322 5584 6935 1108 4850 7750 5094 10499 51105 7536 6433 3326 57551 9205 23301 121665 11198 8028 2778 51592 54832 6249 9043 8295 6599 10806 6418 4660 9584 5885 27327	C=2223;O=44;E=25.10;R=1.75;rawP=0.0001;adjP=0.0039			5	MAZ	mmu_GGGAGGRR_V$MAZ_Q6	44	99412 18521 15516 216965 56086 170791 231769 329251 67493 233833 56430 19357 232341 17354 70834 107932 229279 71458 225131 74360 100683 114741 216565 17978 14683 22668 71175 239510 94093 226517 81702 17931 76816 21417 207304 219105 74585 20588 76007 53621 18759 320528 227937 71592	C=2101;O=44;E=16.17;R=2.72;rawP=9.88e-10;adjP=1.87e-07
	6	AHR	hsa_V$AHR_Q5	10	51322 6935 7750 5094 7536 8028 11198 5980 26036 6418	C=207;O=10;E=2.34;R=4.28;rawP=0.0001;adjP=0.0039			6	AHR	mmu_V$AHR_Q5	9	18521 56086 17354 225131 114741 22668 19714 21417 76007	C=201;O=9;E=1.55;R=5.82;rawP=2.76e-05;adjP=0.0007
	7	MYB	hsa_V$CMYB_01	11	55119 55870 9643 220988 10180 51322 7707 8028 9043 996 22823	C=243;O=11;E=2.74;R=4.01;rawP=0.0001;adjP=0.0039			7	MYB	mmu_V$CMYB_01	10	217232 17354 70834 229279 225131 192195 17765 56397 19654 66921	C=227;O=10;E=1.75;R=5.72;rawP=1.14e-05;adjP=0.0004
	8	AP2	hsa_V$AP2_Q6_01	11	79893 54880 57534 25836 65125 10180 1108 7750 10499 8189 5885	C=261;O=11;E=2.95;R=3.73;rawP=0.0002;adjP=0.0066			8	AP2	mmu_V$AP2_Q6_01	10	225164 19357 68188 232341 107932 71458 17978 71175 19654 76007	C=249;O=10;E=1.92;R=5.22;rawP=2.53e-05;adjP=0.0007
	9	FAC1	hsa_V$FAC1_01	10	6526 11183 4850 9736 55193 121665 2778 22902 27327 56946	C=215;O=10;E=2.43;R=4.12;rawP=0.0002;adjP=0.0066			9	FAC1	mmu_V$FAC1_01	9	399510 233833 17847 66923 53881 14683 52822 74585 53621	C=206;O=9;E=1.59;R=5.68;rawP=3.35e-05;adjP=0.0008
	10	E2F	hsa_V$E2F_Q4	10	25836 6434 7750 5591 84901 55193 23301 26060 22823 56946	C=231;O=10;E=2.61;R=3.83;rawP=0.0003;adjP=0.0077			10	E2F	mmu_V$E2F_Q6	9	18020 19090 20462 66923 216565 71175 17765 76007 72993	C=214;O=9;E=1.65;R=5.47;rawP=4.50e-05;adjP=0.0010
	10	E2F	hsa_V$E2F1_Q6	10	25836 6434 26135 5591 84901 55193 23301 26060 22823 56946	C=228;O=10;E=2.57;R=3.88;rawP=0.0003;adjP=0.0077			10	E2F	mmu_V$E2F_Q4	9	18020 19090 20462 66923 216565 71175 17765 76007 72993	C=216;O=9;E=1.66;R=5.41;rawP=4.84e-05;adjP=0.0010
	10	E2F	hsa_V$E2F_Q6	10	25836 6434 7750 5591 84901 55193 23301 26060 22823 56946	C=229;O=10;E=2.59;R=3.87;rawP=0.0003;adjP=0.0077			10	E2F	mmu_V$E2F1_Q6	9	18020 19090 20462 66923 216565 71175 17765 66870 72993	C=214;O=9;E=1.65;R=5.47;rawP=4.50e-05;adjP=0.0010
	10	E2F	hsa_V$E2F_02	9	25836 6434 5591 84901 55193 23301 26060 22823 56946	C=230;O=9;E=2.60;R=3.47;rawP=0.0013;adjP=0.0208			11	E4F1	mmu_GTGACGY_V$E4F1_Q6	17	99412 17354 12912 20462 19330 74360 66923 57434 72162 14683 75717 22668 240174 81702 56397 227937 22763	C=593;O=17;E=4.56;R=3.73;rawP=3.93e-06;adjP=0.0002
	10	E2F	hsa_V$E2F4DP2_01	9	25836 6434 5591 84901 55193 23301 26060 22823 56946	C=230;O=9;E=2.60;R=3.47;rawP=0.0013;adjP=0.0208			12	PAX4	mmu_V$PAX4_04	9	233833 107932 192119 114741 53881 71175 56397 228790 76007	C=202;O=9;E=1.55;R=5.79;rawP=2.87e-05;adjP=0.0007
	10	E2F	hsa_V$E2F1DP1_01	9	25836 6434 5591 84901 55193 23301 26060 22823 56946	C=230;O=9;E=2.60;R=3.47;rawP=0.0013;adjP=0.0208			13	USF	mmu_V$USF_01	10	56086 107932 229279 76804 14683 75717 239510 67500 56397 71592	C=235;O=10;E=1.81;R=5.53;rawP=1.54e-05;adjP=0.0005
	10	E2F	hsa_V$E2F1DP2_01	9	25836 6434 5591 84901 55193 23301 26060 22823 56946	C=230;O=9;E=2.60;R=3.47;rawP=0.0013;adjP=0.0208			14	SP1	mmu_GGGCGGR_V$SP1_Q6	46	99412 18521 15516 56086 225164 217653 56430 232341 68188 70834 107932 12912 70144 74838 71458 225131 74360 100683 114741 16195 72047 236266 17978 216565 231380 75717 71175 67812 94093 207214 17765 71833 56397 17931 22019 227195 76816 74585 13211 66870 76007 108989 18759 55935 53621 72993	C=2699;O=46;E=20.77;R=2.21;rawP=2.10e-07;adjP=1.34e-05
	10	E2F	hsa_V$E2F4DP1_01	9	25836 6434 5591 84901 55193 23301 26060 22823 56946	C=234;O=9;E=2.64;R=3.41;rawP=0.0014;adjP=0.0217			15	MEIS1	mmu_TGACAGNY_V$MEIS1_01	18	14359 68420 170791 226541 233833 70834 71458 76804 74360 66923 20817 14783 72047 71175 192195 239510 66870 53621	C=755;O=18;E=5.81;R=3.10;rawP=2.47e-05;adjP=0.0007
	11	E4F1	hsa_GTGACGY_V$E4F1_Q6	18	8502 26057 9643 9702 8065 63892 7516 6434 1385 7536 55193 51663 8028 284618 2778 22931 170506 56946	C=641;O=18;E=7.24;R=2.49;rawP=0.0004;adjP=0.0098			16	MAX	mmu_V$MAX_01	9	66661 107932 71458 114741 14683 239510 67500 66870 71592	C=236;O=9;E=1.82;R=4.96;rawP=9.55e-05;adjP=0.0014
	12	PAX4	hsa_V$PAX4_04	9	6526 9643 25836 1108 7750 171023 11198 23405 27327	C=212;O=9;E=2.39;R=3.76;rawP=0.0007;adjP=0.0142			17	TEF1	mmu_WGGAATGY_V$TEF1_Q6	11	107932 233977 16195 67533 30945 17765 228790 18759 227937 19247 71592	C=345;O=11;E=2.65;R=4.14;rawP=8.16e-05;adjP=0.0014
	13	USF	hsa_V$USF_01	10	9643 57645 220988 8065 1108 55749 51105 2778 6418 23081	C=255;O=10;E=2.88;R=3.47;rawP=0.0007;adjP=0.0142
	14	SP1	hsa_GGGCGGR_V$SP1_Q6	50	79893 4659 10238 80155 1660 54880 9643 55320 57534 25836 9702 65125 8065 23190 3572 51322 5584 1108 1385 7750 4850 84859 5094 26135 10499 27332 23360 3326 23301 26060 8189 55236 121665 11198 54891 51592 6249 7175 9043 8295 26036 7158 7174 10806 6418 113251 7840 22823 11325 56946	C=2863;O=50;E=32.32;R=1.55;rawP=0.0010;adjP=0.0194
	15	MEIS1	hsa_TGACAGNY_V$MEIS1_01	19	55870 54880 9702 25836 88455 27252 4850 26135 6733 27332 51105 55193 8087 9043 2887 9584 23081 11325 27327	C=808;O=19;E=9.12;R=2.08;rawP=0.0021;adjP=0.0287
	16	MAX	hsa_V$MAX_01	9	54880 57645 1108 26135 55749 6731 51105 11198 2778	C=256;O=9;E=2.89;R=3.11;rawP=0.0026;adjP=0.0318
	17	TEF1	hsa_WGGAATGY_V$TEF1_Q6	11	8502 8500 57645 3572 8496 5584 5781 1108 25897 171023 22823	C=362;O=11;E=4.09;R=2.69;rawP=0.0028;adjP=0.0334
